# Supplementary material for: Characterization of a New Temperate Escherichia coli Phage vB_EcoP_ZX5 and Its Regulatory Protein
Source: MDPI journal article supplement (doi:10.3390/pathogens11121445), 2022-11-30
Supplement: s1 [file s1]

## Supplementary Materials

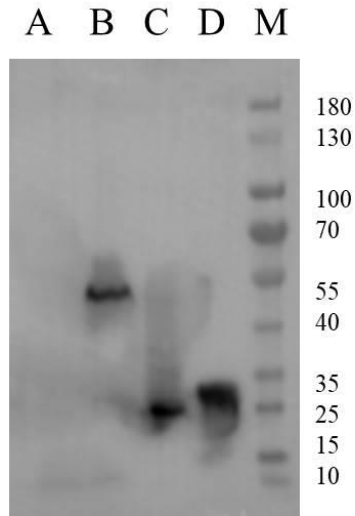

A: pGEX-6p-GST  
 B: pGEX-6p-Integrase  
 C: pGEX-6p-Repressor  
 D: pGEX-6p-Anti-repressor

Figure S1: Western blot of protein expression. A: *E. coli* YO1 carrying GST tag overexpression plasmid was induced by IPTG (negative control); B: *E. coli* YO1 carrying integrase overexpression plasmid was induced by IPTG; C: *E. coli* YO1 carrying repressor overexpression plasmid was induced by IPTG; D: *E. coli* YO1 carrying anti-repressor overexpression plasmid was induced by IPTG.

Table S1. Primers used in this study

| Primers | Sequence                      | Tm<br>(°C) | Size<br>(bp) | Target<br>gene/ORF                   |
|---------|-------------------------------|------------|--------------|--------------------------------------|
| fliCF   | ATGGCACAAGTCATTAATACCCA<br>AC | 54         | 1497         | <i>fliC</i> in <i>E. coli</i><br>YO1 |
| fliCR   | CTAACCCTGCAGCAGAGACA          | 53         |              |                                      |
| K1F     | CATCCAGACGATAAGCATGAGC<br>A   | 55         | 250          | <i>kpsM</i> in <i>E. coli</i><br>YO1 |
| K1R     | GCGCATTTGCTGATACTGTTG         | 52         |              |                                      |
| aatAF   | CTGGCGAAAGACTGTATCAT          | 50         | 630          | <i>aatA</i> in EAEC                  |
| aatAR   | CAATGTATAGAAATCCGCTGTT        | 50         |              |                                      |
| aggRF   | CTAATTGTACAATCGATGTA          | 45         | 308          | <i>aggR</i> in EAEC                  |

|       |                              |    |                 |                                    |
|-------|------------------------------|----|-----------------|------------------------------------|
| aggRR | ATGAAGTAATTCTTGAAT           | 43 |                 |                                    |
| eaeF  | GACCCGGCACAAGCATAAGC         | 56 | 384             | <i>eae</i> in STEC and EPEC        |
| eaeR  | CCACCTGCAGCAACAAGAGG         | 56 |                 |                                    |
| bfpAF | CAATGGTGCTTGCGCTTGCT         | 54 | 324             | <i>bfpA</i> in EPEC                |
| bfpAR | GCCGCTTTATCCAACCTGGT         | 54 |                 |                                    |
| ltAF  | GGCGACAGATTATACCGTGC         | 54 | 450             | <i>ltA</i> in ETEC                 |
| ltAR  | CGGTCTCTATATCCCTGTT          | 50 |                 |                                    |
| stAF  | ATTTTMTTCTGTATTRTCTT         | 46 | 190             | <i>stA</i> in ETEC                 |
| stAR  | CACCCGGTACARGCAGGATT         | 53 |                 |                                    |
| ipaHF | CTCGGCACGTTTTAATAGTCTGG      | 55 | 917             | <i>ipaH</i> in EIEC                |
| ipaHR | GTGGAGAGCTGAAGTTTCTCTGC      | 57 |                 |                                    |
| stx1F | ATAAATCGCCATTCGTTGACTAC      | 52 | 188             | <i>stx1</i> in STEC                |
| stx1R | AGAACGCCCCACTGAGATCATC       | 55 |                 |                                    |
| stx2F | GGCACTGTCTGAAACTGCTCC        | 56 | 255             | <i>stx2</i> in STEC                |
| stx2R | TCGCCAGTTATCTGACATTCTG       | 53 |                 |                                    |
| 1F    | GAATTGTGCTTACCGATAC          | 49 | 1246            | ORF12 integrase                    |
| 1R    | CCATCCACTTCTCAAACCTCG        | 52 |                 |                                    |
| 2F    | GTGACAGATACAGCGTTA           | 48 | 1473            | ORF34 terminase large subunit      |
| 2R    | GCATAGGGATCGTAATCTGT         | 50 |                 |                                    |
| 3F    | TGCCGTACGATTCCTCGGT          | 54 | 286             | <i>attB</i> in <i>E. coli</i> YO1  |
| 3R    | ATGACTGAAGGCGGTCGCGATCT<br>G | 58 |                 |                                    |
| 3F2   | TGGTACTGATTTCCGGTGACGGT      | 57 | 281<br>(3F2/3R) | <i>attR</i> in <i>E. coli</i> YO1+ |

---

|     |                                             |    |                 |                                                                |
|-----|---------------------------------------------|----|-----------------|----------------------------------------------------------------|
| 3R2 | TATGGTGTAGAGTGAATAG                         | 47 | 214<br>(3F/3R2) | attL in <i>E. coli</i><br>YO1+                                 |
| 4F  | TTGTAAGGTCGTGGTGACCG                        | 56 | 203             | ORF34<br>terminase large<br>subunit in<br>phage<br>vB_EcoP_ZX5 |
| 4R  | CGAATGCCTCAGTGTTGTGC                        | 56 |                 |                                                                |
| 5F  | CAGGAAACAGTATTCATGTCCAT<br>GACAGCTACAAAAAGC | 64 | 771             | ORF4 anti-<br>repressor in<br>phage<br>vB_EcoP_ZX5             |
| 5R  | TTAGTGATGATGGTGGTGATGGA<br>AGAACCCTGCTTTGTC | 66 |                 |                                                                |
| 6F  | CAGGAAACAGTATTCATGTCCGT<br>GCTTACCGATACAAAA | 64 | 1326            | ORF12<br>integrase in<br>phage<br>vB_EcoP_ZX5                  |
| 6R  | TTAGTGATGATGGTGGTGATGTT<br>CCCCCGCCATCCACTT | 67 |                 |                                                                |
| 7F  | CAGGAAACAGTATTCATGTCCAT<br>GAAAAGTATCCAGGAC |    | 660             | ORF21<br>repressor in<br>phage<br>vB_EcoP_ZX5                  |
| 7R  | TTAGTGATGATGGTGGTGATGTT<br>GTTTGTTCGTT      | 64 |                 |                                                                |
| 8F  | TCGGAAGCTGTGGTATGGCTGTG<br>CA               | 61 | 1000            | plasmids<br>pGEX-6P-1                                          |
| 8R  | CCGGGAGCTGCATGTGTCAGAG<br>G                 | 62 |                 |                                                                |
| 9F  | GAGCGAACACTGACACCAGA                        | 58 | 200             | ORF12<br>integrase in<br>phage<br>vB_EcoP_ZX5                  |
| 9R  | CTTCCCTTCATGCGGTCTGA                        | 58 |                 |                                                                |
| 10F | AATGGTGTTTCAGACGCGGAT                       | 56 | 171             | ORF21<br>repressor in<br>phage<br>vB_EcoP_ZX5                  |
| 10R | ACCTTCCTGAGAAAGCGAGC                        | 58 |                 |                                                                |
| 11F | GCTTCAGATGTTTGTCGGGC                        | 58 | 188             | ORF4 anti-<br>repressor in<br>phage<br>vB_EcoP_ZX5             |
| 11R | ATAGTGCCTGGTGTCACTGC                        | 58 |                 |                                                                |
| 12F | GTCAGCGGACTGGCTAACTT                        | 58 | 172             |                                                                |

---

|     |                      |    |     |                                               |
|-----|----------------------|----|-----|-----------------------------------------------|
| 12R | AATTCCAGCCATCACCAGGG | 58 |     | ORF10<br>endolysin in<br>phage<br>vB_EcoP_ZX5 |
| 13F | GGCATAGCAATTCGCGTTGT | 56 | 198 | ORF9 holin in<br>phage<br>vB_EcoP_ZX5         |
| 13R | AATAACCGCAGCCAGCATGA | 56 |     |                                               |

Table S2: Open reading frames (ORFs) of phage vB\_EcoP\_ZX5

| ORF   | Start | Stop  | Strand | Length<br>(bp) | Start<br>codon | Function                                       |
|-------|-------|-------|--------|----------------|----------------|------------------------------------------------|
| ORF1  | 133   | 2     | -      | 132            | ATG            | hypothetical protein                           |
| ORF2  | 658   | 155   | -      | 504            | ATG            | hypothetical protein                           |
| ORF3  | 956   | 630   | -      | 327            | ATG            | hypothetical protein                           |
| ORF4  | 1773  | 1078  | -      | 696            | ATG            | anti-repressor                                 |
| ORF5  | 1892  | 1779  | -      | 114            | GTG            | ash family protein                             |
| ORF6  | 2346  | 2089  | -      | 258            | ATG            | hypothetical protein                           |
| ORF7  | 2542  | 5661  | +      | 3120           | ATG            | tail fiber domain-containing<br>protein        |
| ORF8  | 5968  | 6372  | +      | 405            | ATG            | membrane protein                               |
| ORF9  | 6359  | 6667  | +      | 309            | ATG            | phage holin family protein                     |
| ORF10 | 6657  | 7286  | +      | 630            | ATG            | endolysin                                      |
| ORF11 | 7283  | 7765  | +      | 483            | ATG            | DUF2514 domain-containing<br>protein           |
| ORF12 | 8083  | 9333  | +      | 1251           | GTG            | site-specific integrase                        |
| ORF13 | 9531  | 9337  | -      | 195            | ATG            | hypothetical protein                           |
| ORF14 | 10178 | 9528  | -      | 651            | ATG            | Adenine DNA<br>methyltransferase               |
| ORF15 | 10470 | 10171 | -      | 300            | GTG            | perC transcriptional activator                 |
| ORF16 | 10583 | 10467 | -      | 117            | ATG            | hypothetical protein                           |
| ORF17 | 10828 | 10580 | -      | 249            | ATG            | AlpA family phage<br>regulatory protein        |
| ORF18 | 11759 | 10878 | -      | 882            | ATG            | recombinase RecT                               |
| ORF19 | 12577 | 11756 | -      | 822            | ATG            | exodeoxyribonuclease<br>VIII/RecE-like protein |

|       |       |       |   |      |     |                                   |
|-------|-------|-------|---|------|-----|-----------------------------------|
| ORF20 | 13028 | 12876 | - | 153  | ATG | hypothetical protein              |
| ORF21 | 13766 | 13182 | - | 585  | ATG | repressor                         |
| ORF22 | 13921 | 14151 | + | 231  | ATG | hypothetical protein              |
| ORF23 | 14493 | 15323 | + | 831  | ATG | primosomal protein I              |
| ORF24 | 15295 | 16071 | + | 777  | ATG | DNA replication protein           |
| ORF25 | 16189 | 16533 | + | 345  | ATG | DUF1064 domain-containing protein |
| ORF26 | 16595 | 17158 | + | 564  | ATG | eae-like protein                  |
| ORF27 | 17155 | 17388 | + | 234  | ATG | hypothetical protein              |
| ORF28 | 17385 | 18047 | + | 663  | ATG | hypothetical protein              |
| ORF29 | 18049 | 18240 | + | 192  | ATG | hypothetical protein              |
| ORF30 | 18243 | 18857 | + | 615  | ATG | EaA-like protein                  |
| ORF31 | 18854 | 19207 | + | 354  | ATG | phage ninx                        |
| ORF32 | 19200 | 19538 | + | 339  | ATG | hypothetical protein              |
| ORF33 | 19660 | 20253 | + | 594  | ATG | terminase small subunit           |
| ORF34 | 20250 | 21725 | + | 1476 | GTG | terminase large subunit           |
| ORF35 | 22154 | 21816 | - | 339  | ATG | hypothetical protein              |
| ORF36 | 22176 | 22427 | + | 252  | ATG | hypothetical protein              |
| ORF37 | 22861 | 23067 | + | 207  | ATG | hypothetical protein              |
| ORF38 | 23082 | 24761 | + | 1680 | ATG | phage collar                      |
| ORF39 | 24758 | 25054 | + | 297  | ATG | hypothetical protein              |
| ORF40 | 25057 | 25752 | + | 696  | ATG | peptidase                         |
| ORF41 | 25767 | 26753 | + | 987  | ATG | capsid protein                    |
| ORF42 | 26805 | 27242 | + | 438  | ATG | hypothetical protein              |
| ORF43 | 27253 | 27582 | + | 330  | ATG | hypothetical protein              |
| ORF44 | 27633 | 27956 | + | 324  | ATG | hypothetical protein              |
| ORF45 | 27956 | 28561 | + | 606  | ATG | hypothetical protein              |
| ORF46 | 28561 | 31032 | + | 2472 | ATG | hypothetical protein              |
| ORF47 | 31032 | 31496 | + | 465  | ATG | hypothetical protein              |
| ORF48 | 31496 | 32041 | + | 546  | ATG | hypothetical protein              |

---

|       |       |       |   |      |     |                      |
|-------|-------|-------|---|------|-----|----------------------|
| ORF49 | 32041 | 34554 | + | 2514 | ATG | virion protein       |
| ORF50 | 34551 | 36353 | + | 1803 | ATG | hypothetical protein |
| ORF51 | 36359 | 38833 | + | 2475 | ATG | hypothetical protein |
| ORF52 | 39053 | 39433 | + | 381  | ATG | hypothetical protein |
| ORF53 | 39563 | 39465 | - | 99   | ATG | hypothetical protein |

---
